# Supplementary material
Source: PubMed Central journal article supplement (PMC5668161)
Supplement: NIHMS896131-supplement-3.pdf [file NIHMS896131-supplement-3.pdf]

**Supplementary table S1.** X-ray crystallographic data collection and refinement statistics

|                                      | <b>HER2-2Rs15d</b>                                |
|--------------------------------------|---------------------------------------------------|
| <b>Data collection statistics</b>    |                                                   |
| Wavelength (Å)                       | 0.9999                                            |
| Resolution range (Å)                 | 47.794 - 2.246 (2.326 - 2.246)                    |
| Space group                          | oP: P2 <sub>1</sub> 2 <sub>1</sub> 2 <sub>1</sub> |
| a, b, c (Å)                          | 66.52, 113.52, 137.43                             |
| α, β, γ (°)                          | 90, 90, 90                                        |
| Mosaicity (°)                        | 0.091                                             |
| Total number of measured reflections | 162919 (15517)                                    |
| Unique reflections                   | 49524 (4790)                                      |
| Multiplicity                         | 3.3 (3.2)                                         |
| Completeness (%)                     | 98.10 (96.6)                                      |
| <I/σ(I)>                             | 9.65 (1.70)                                       |
| Wilson B-factor (Å <sup>2</sup> )    | 39.53                                             |
| R <sub>meas</sub> (%)                | 10.31 (70.91)                                     |
| CC <sub>1/2</sub> (%)                | 99.5 (66.4)                                       |
| A.U. contains                        | one HER2-2Rs15d complex                           |
|                                      |                                                   |
| <b>Refinement statistics</b>         |                                                   |
| CC*                                  | 0.999 (0.893)                                     |
| CC <sub>work</sub>                   | 0.941 (0.841)                                     |
| CC <sub>free</sub>                   | 0.936 (0.764)                                     |
| R <sub>work</sub> (%)                | 18.48 (25.68)                                     |
| R <sub>free</sub> (%)                | 22.01 (29.39)                                     |
| Number of non-hydrogen atoms         | 5581                                              |
| macromolecules                       | 5157                                              |
| ligands                              | 54                                                |
| Protein residues                     | 673                                               |

|                                    | <b>HER2-2Rs15d</b> |
|------------------------------------|--------------------|
| RMS bond lengths (Å)               | 0.007              |
| RMS bond angles (°)                | 0.99               |
| Ramachandran favored (%)           | 97.0               |
| Ramachandran allowed (%)           | 3.5                |
| Ramachandran outliers (%)          | 0.0                |
| Rotamer outliers (%)               | 1.2                |
| Clashscore                         | 4.23               |
| Average B-factor (Å <sup>2</sup> ) | 49.20              |
| macromolecules                     | 48.95              |
| ligands                            | 81.35              |
| solvent                            | 48.02              |
| Number of TLS groups               | 10                 |
| PDB ID                             | 5MY6               |
