# Supplementary material
Source: PubMed Central journal article supplement (PMC5668161)
Supplement: NIHMS896131-supplement-4.pdf [file NIHMS896131-supplement-4.pdf]

**Supplementary table S2.** The interactions between 2Rs15d and HER2 domain I. Also see Figure S2. Distances only given in case of hydrogen bonds or electrostatic interactions.

| 2Rs15d  |               |        | HER2 domain I |                | Interaction (distance) |
|---------|---------------|--------|---------------|----------------|------------------------|
| Residue | Group         | FR/CDR | Residue       | Group          |                        |
| Cys32   | side chain    | CDR1   | Asn177        | backbone       | Van der Waals          |
| Cys32   | side chain    | CDR1   | Gln178        | backbone       | Van der Waals          |
| Cys32   | side chain    | CDR1   | Leu179        | backbone       | Van der Waals          |
| Cys32   | side chain    | CDR1   | Ala180        | backbone       | Van der Waals          |
| Cys32   | backbone CO   | CDR1   | Ala180        | backbone NH    | hydrogen bond (2.88 Å) |
| Cys32   | side chain    | CDR1   | Leu181        | backbone       | Van der Waals          |
| Cys32   | backbone CO   | CDR1   | Leu181        | backbone NH    | hydrogen bond (3.81 Å) |
| Gly33   | side chain    | CDR1   | Gln178        | backbone       | Van der Waals          |
| Gly33   | backbone NH   | CDR1   | Gln178        | backbone CO    | hydrogen bond (3.43 Å) |
| Gly33   | side chain    | CDR1   | Leu181        | side chain     | Van der Waals          |
| Met34   | backbone      | FR     | Leu181        | side chain     | Van der Waals          |
| Tyr37   | side chain OH | FR     | Tyr112        | side chain OH  | hydrogen bond (2.82 Å) |
| Tyr37   | side chain    | FR     | Leu181        | side chain     | hydrophobic            |
| Tyr37   | side chain    | FR     | Leu183        | side chain     | hydrophobic            |
| Glu44   | side chain    | FR     | Arg157        | side chain     | electrostatic (4.23 Å) |
| Arg45   | backbone CO   | FR     | Gln156        | side chain NH2 | hydrogen bond (2.96 Å) |
| Arg45   | side chain    | FR     | Leu183        | side chain     | hydrophobic            |
| Leu47   | side chain    | FR     | Asn111        | side chain     | Van der Waals          |
| Leu47   | side chain    | FR     | Tyr112        | side chain     | Van der Waals          |
| Arg50   | side chain    | FR     | Asp110        | backbone CO    | hydrogen bond (2.68 Å) |
| Arg50   | side chain    | FR     | Asn111        | side chain CO  | hydrogen bond (2.53 Å) |
| Arg50   | side chain    | FR     | Leu179        | side chain     | Van der Waals          |
| Gly53   | side chain    | CDR2   | Gln178        | side chain     | Van der Waals          |
| Gly53   | backbone NH   | CDR2   | Gln178        | backbone CO    | hydrogen bond (2.82 Å) |
| Asp54   | side chain    | CDR2   | Gln178        | side chain     | Van der Waals          |

| 2Rs15d |             |      | HER2 domain I |               | Interaction (distance) |
|--------|-------------|------|---------------|---------------|------------------------|
| Asp54  | backbone NH | CDR2 | Gln178        | side chain CO | hydrogen bond (3.38 Å) |
| Trp58  | side chain  | FR   | Asp110        | side chain    | hydrogen bond (2.91 Å) |
| Ala96  | side chain  | CDR3 | Leu181        | side chain    | hydrophobic            |
| Val97  | backbone    | CDR3 | Leu181        | side chain    | Van der Waals          |
| Cys98  | side chain  | CDR3 | Leu181        | side chain    | Van der Waals          |
| Leu101 | side chain  | CDR3 | Lys170        | backbone      | Van der Waals          |
| Leu101 | side chain  | CDR3 | Phe173        | side chain    | hydrophobic            |
| Leu101 | side chain  | CDR3 | Lys153        | backbone      | Van der Waals          |
| Leu101 | side chain  | CDR3 | His174        | backbone      | Van der Waals          |
| Leu101 | side chain  | CDR3 | Asn177        | side chain    | Van der Waals          |
| Leu101 | side chain  | CDR3 | Ala180        | side chain    | hydrophobic            |
| Leu101 | side chain  | CDR3 | Arg217        | side chain    | Van der Waals          |
| Glu102 | side chain  | CDR3 | Lys170        | side chain    | electrostatic (3.62 Å) |
| Thr103 | side chain  | CDR3 | Thr182        | backbone NH   | hydrogen bond (3.10 Å) |
| Thr103 | side chain  | CDR3 | Leu183        | backbone CO   | hydrogen bond (3.78 Å) |
| Trp105 | side chain  | FR   | Leu183        | side chain    | hydrophobic            |
