# Supplementary material
Source: PubMed Central journal article supplement (PMC5668161)
Supplement: NIHMS896131-supplement-5.pdf [file NIHMS896131-supplement-5.pdf]

**Supplementary table S3.** *In vivo* biodistribution of [<sup>131</sup>I]-2Rs15d after 1, 4 and 24h in mice with BT474/M1 and SKOV-3 xenografts (% IA/cc). Data are presented as mean ± SD (n = 3).

| <b>Organ/tissue</b> | <b>1h</b>   |          |           | <b>4h</b>   |          |           | <b>24h</b>  |          |           |
|---------------------|-------------|----------|-----------|-------------|----------|-----------|-------------|----------|-----------|
| <b>BT474/M1</b>     | <b>Mean</b> | <b>±</b> | <b>SD</b> | <b>Mean</b> | <b>±</b> | <b>SD</b> | <b>Mean</b> | <b>±</b> | <b>SD</b> |
| Tumor               | 6.48        | ±        | 2.58      | 6.16        | ±        | 3.30      | 2.50        | ±        | 1.22      |
| Kidneys             | 20.75       | ±        | 4.18      | 4.54        | ±        | 0.81      | 0.41        | ±        | 0.01      |
| Muscle              | 0.46        | ±        | 0.14      | 0.19        | ±        | 0.02      | 0.08        | ±        | 0.03      |
| Thyroid             | 0.43        | ±        | 0.10      | 0.75        | ±        | 0.36      | 0.88        | ±        | 0.42      |
| <b>Organ/tissue</b> | <b>1h</b>   |          |           | <b>4h</b>   |          |           | <b>24h</b>  |          |           |
| <b>SKOV-3</b>       | <b>Mean</b> |          | <b>SD</b> | <b>Mean</b> |          | <b>SD</b> | <b>Mean</b> |          | <b>SD</b> |
| Tumor               | 2.31        | ±        | 0.22      | 2.12        | ±        | 0.21      | 1.16        | ±        | 0.03      |
| Kidneys             | 22.22       | ±        | 3.27      | 9.07        | ±        | 0.56      | 0.40        | ±        | 0.10      |
| Muscle              | 0.38        | ±        | 0.04      | 0.15        | ±        | 0.05      | 0.09        | ±        | 0.03      |
| Thyroid             | 0.45        | ±        | 0.11      | 0.36        | ±        | 0.13      | 0.23        | ±        | 0.10      |
