# Supplementary material
Source: PubMed Central journal article supplement (PMC5668161)
Supplement: NIHMS896131-supplement-6.pdf [file NIHMS896131-supplement-6.pdf]

**Supplementary table S4.** *Ex vivo* biodistribution of [<sup>131</sup>I]-2Rs15d and [<sup>131</sup>I]-control in mice with BT474/M1 xenografts (n = 3). Values are expressed as % IA/g, except for thyroid for which % IA was used. Radiation doses from 37 MBq of [<sup>131</sup>I]-2Rs15d were calculated using trapezoid integration of measured radionuclide activity in tissues of interest, and expressed in cGy.

| Organ/<br>tissue | [ <sup>131</sup> I]-2Rs15d |   |       |       |   |       |       |   |        |        |   |        |        |   |        | [ <sup>131</sup> I]-control |   |        | [ <sup>131</sup> I]-2Rs15d<br>cGy / 37 MBq |      |        |        |      |        |      |      |      |         |      |
|------------------|----------------------------|---|-------|-------|---|-------|-------|---|--------|--------|---|--------|--------|---|--------|-----------------------------|---|--------|--------------------------------------------|------|--------|--------|------|--------|------|------|------|---------|------|
|                  | 1h                         |   |       | 3h    |   |       | 6h    |   |        | 24h    |   |        | 48h    |   |        | 72h                         |   |        |                                            | 96h  |        |        | 120h |        |      | 4h   |      |         |      |
|                  | Mean                       | ± | SD    | Mean  | ± | SD    | Mean  | ± | SD     | Mean   | ± | SD     | Mean   | ± | SD     | Mean                        | ± | SD     |                                            | Mean | ±      | SD     | Mean | ±      | SD   | Mean | ±    | SD      | Mean |
| Lungs            | 0.94                       | ± | 0.17  | 0.30  | ± | 0.11  | 0.19  | ± | 0.04   | 0.05   | ± | 0.02   | 0.02   | ± | 0.01   | 0.01                        | ± | 0.002  | 0.02                                       | ±    | 0.01   | 0.01   | ±    | 0.003  | 0.45 | ±    | 0.37 | 26.66   |      |
| Heart            | 0.43                       | ± | 0.07  | 0.15  | ± | 0.02  | 0.08  | ± | 0.004  | 0.02   | ± | 0.001  | 0.01   | ± | 0.003  | 0.01                        | ± | 0.001  | 0.01                                       | ±    | 0.002  | 0.004  | ±    | 0.0003 | 0.09 | ±    | 0.01 | 11.50   |      |
| Liver            | 1.05                       | ± | 0.18  | 0.39  | ± | 0.12  | 0.24  | ± | 0.09   | 0.04   | ± | 0.01   | 0.05   | ± | 0.003  | 0.01                        | ± | 0.002  | 0.02                                       | ±    | 0.01   | 0.01   | ±    | 0.003  | 0.47 | ±    | 0.17 | 31.13   |      |
| Kidneys          | 55.63                      | ± | 8.47  | 12.50 | ± | 2.73  | 7.15  | ± | 1.95   | 0.94   | ± | 0.52   | 0.52   | ± | 0.13   | 0.24                        | ± | 0.14   | 0.13                                       | ±    | 0.06   | 0.09   | ±    | 0.02   | 6.79 | ±    | 2.19 | 835.96  |      |
| Stomach          | 0.94                       | ± | 0.39  | 0.71  | ± | 0.76  | 0.12  | ± | 0.06   | 0.01   | ± | 0.01   | 0.01   | ± | 0.004  | 0.01                        | ± | 0.002  | 0.01                                       | ±    | 0.01   | 0.004  | ±    | 0.001  | 0.14 | ±    | 0.08 | 24.94   |      |
| Pancreas         | 0.18                       | ± | 0.04  | 0.05  | ± | 0.01  | 0.02  | ± | 0.01   | 0.01   | ± | 0.002  | 0.003  | ± | 0.001  | 0.001                       | ± | 0.001  | 0.002                                      | ±    | 0.001  | 0.001  | ±    | 0.001  | 0.03 | ±    | 0.01 | 3.75    |      |
| Spleen           | 0.39                       | ± | 0.07  | 0.21  | ± | 0.02  | 0.09  | ± | 0.04   | 0.02   | ± | 0.004  | 0.01   | ± | 0.002  | 0.01                        | ± | 0.001  | 0.01                                       | ±    | 0.002  | 0.01   | ±    | 0.001  | 0.15 | ±    | 0.06 | 13.22   |      |
| Muscle           | 0.62                       | ± | 0.15  | 0.24  | ± | 0.15  | 0.08  | ± | 0.01   | 0.01   | ± | 0.01   | 0.004  | ± | 0.002  | 0.002                       | ± | 0.001  | 0.002                                      | ±    | 0.002  | 0.003  | ±    | 0.001  | 0.06 | ±    | 0.01 | 11.37   |      |
| Bone             | 1.00                       | ± | 0.08  | 0.53  | ± | 0.30  | 0.28  | ± | 0.20   | 0.04   | ± | 0.01   | 0.02   | ± | 0.01   | 0.02                        | ± | 0.01   | 0.02                                       | ±    | 0.01   | 0.01   | ±    | 0.01   | 0.24 | ±    | 0.09 | 32.24   |      |
| S intestines     | 0.37                       | ± | 0.09  | 0.58  | ± | 0.58  | 0.16  | ± | 0.01   | 0.01   | ± | 0.003  | 0.004  | ± | 0.001  | 0.01                        | ± | 0.01   | 0.003                                      | ±    | 0.001  | 0.002  | ±    | 0.001  | 0.07 | ±    | 0.03 | 20.79   |      |
| L intestines     | 0.30                       | ± | 0.12  | 0.36  | ± | 0.34  | 0.10  | ± | 0.02   | 0.01   | ± | 0.01   | 0.004  | ± | 0.002  | 0.01                        | ± | 0.004  | 0.02                                       | ±    | 0.03   | 0.002  | ±    | 0.001  | 0.10 | ±    | 0.01 | 15.79   |      |
| Blood            | 0.83                       | ± | 0.02  | 0.19  | ± | 0.06  | 0.07  | ± | 0.01   | 0.02   | ± | 0.002  | 0.01   | ± | 0.003  | 0.01                        | ± | 0.002  | 0.01                                       | ±    | 0.001  | 0.01   | ±    | 0.0003 | 0.06 | ±    | 0.01 | 14.72   |      |
| Uterus           | 1.10                       | ± | 0.21  | 0.02  | ± | 0.01  | 0.34  | ± | 0.38   | 0.02   | ± | 0.003  | 0.01   | ± | 0.002  | 0.01                        | ± | 0.002  | 0.01                                       | ±    | 0.002  | 0.004  | ±    | 0.001  | 0.13 | ±    | 0.04 | 23.90   |      |
| Thyroid*         | 0.01                       | ± | 0.002 | 0.001 | ± | 0.001 | 0.001 | ± | 0.0002 | 0.0001 | ± | 0.0001 | 0.0001 | ± | 0.0001 | 0.00001                     | ± | 0.0001 | 0.0001                                     | ±    | 0.0001 | 0.0001 | ±    | 0.0001 | 0.24 | ±    | 0.09 | 0.15    |      |
| Tumor            | 20.22                      | ± | 1.64  | 17.77 | ± | 1.87  | 7.16  | ± | 1.18   | 5.10   | ± | 1.90   | 1.16   | ± | 0.16   | 0.40                        | ± | 0.05   | 0.14                                       | ±    | 0.01   | 0.11   | ±    | 0.03   | 0.14 | ±    | 0.06 | 1188.34 |      |
