# Supplementary material
Source: PubMed Central journal article supplement (PMC5668161)
Supplement: NIHMS896131-supplement-7.pdf [file NIHMS896131-supplement-7.pdf]

**Supplementary table S5.** *Ex vivo* biodistribution 1 h after injecting [<sup>131</sup>I]-2Rs15d in mice with BT474/M1 xenografts that were pre-treated 72 h earlier with a 100-fold molar excess of trastuzumab, pertuzumab or a combination of both. Values are expressed as % IA/g, except for thyroid for which % IA was used. Data are presented as mean ± SD (n = 4). No significant differences in tumor targeting were observed (p = 0.62).

| Organ/tissue  | PBS   |   |      | trastuzumab |   |      | pertuzumab |   |      | combination |   |      |
|---------------|-------|---|------|-------------|---|------|------------|---|------|-------------|---|------|
|               | Mean  | ± | SD   | Mean        | ± | SD   | Mean       | ± | SD   | Mean        | ± | SD   |
| Lungs         | 0.94  | ± | 0.33 | 0.59        | ± | 0.22 | 0.75       | ± | 0.21 | 0.97        | ± | 0.46 |
| Heart         | 0.34  | ± | 0.03 | 0.35        | ± | 0.04 | 0.39       | ± | 0.03 | 0.47        | ± | 0.06 |
| Liver         | 1.58  | ± | 0.26 | 1.82        | ± | 0.78 | 0.95       | ± | 0.49 | 1.38        | ± | 0.29 |
| Stomach       | 0.54  | ± | 0.15 | 0.58        | ± | 0.19 | 0.51       | ± | 0.19 | 0.87        | ± | 0.28 |
| Pancreas      | 0.13  | ± | 0.03 | 0.14        | ± | 0.01 | 0.21       | ± | 0.14 | 0.18        | ± | 0.01 |
| Spleen        | 0.43  | ± | 0.10 | 0.49        | ± | 0.15 | 0.44       | ± | 0.05 | 0.70        | ± | 0.10 |
| Muscle        | 0.53  | ± | 0.16 | 0.87        | ± | 0.70 | 0.34       | ± | 0.06 | 0.87        | ± | 0.53 |
| Bone          | 0.95  | ± | 0.19 | 0.78        | ± | 0.06 | 1.14       | ± | 0.46 | 1.10        | ± | 0.10 |
| S. intestines | 0.27  | ± | 0.10 | 0.25        | ± | 0.06 | 0.24       | ± | 0.08 | 0.45        | ± | 0.10 |
| L. intestines | 0.32  | ± | 0.14 | 0.16        | ± | 0.03 | 0.25       | ± | 0.12 | 0.41        | ± | 0.09 |
| Blood         | 0.77  | ± | 0.11 | 0.57        | ± | 0.06 | 0.66       | ± | 0.14 | 0.82        | ± | 0.09 |
| Tumor         | 11.00 | ± | 3.94 | 9.31        | ± | 2.35 | 8.91       | ± | 2.06 | 8.59        | ± | 2.85 |
